# Supplementary material for: Measured and simulated thermoelectric properties of FeAs2−xSex (x = 0.30–1.0): from marcasite to arsenopyrite structure
Source: Royal Society of Chemistry journal article supplement (doi:10.1039/d0ma00371a), 2020-01-01
Supplement: d0ma00371a1.pdf [file d0ma00371a1.pdf]

## **Measured and Simulated Thermoelectric Properties of FeAs<sub>2-x</sub>Se<sub>x</sub> ( $x = 0.30 - 1.0$ ): from Marcasite to Arsenopyrite Structure**

Christopher J. Perez,<sup>1</sup> Kasey P. Devlin,<sup>1</sup> Callista M. Skaggs,<sup>2</sup> Xiaoyan Tan,<sup>2,3\*</sup> Corey E. Frank,<sup>3</sup> Jackson R. Badger,<sup>1</sup> Chang-Jong Kang,<sup>4</sup> Thomas J. Emge,<sup>3</sup> Susan M. Kauzlarich,<sup>1</sup> Valentin Taufour,<sup>5</sup> Gabriel Kotliar,<sup>4</sup> Saul H. Lapidus,<sup>6</sup> and Martha Greenblatt<sup>3\*</sup>

<sup>1</sup> Department of Chemistry, University of California, Davis, One Shields Ave., Davis, CA 95616, United States

<sup>2</sup> Department of Chemistry and Biochemistry, George Mason University, Fairfax, Virginia 22030, United States

<sup>3</sup> Department of Chemistry and Chemical Biology, Rutgers, The State University of New Jersey, Piscataway, New Jersey 08854, United States.

<sup>4</sup> Department of Physics and Astronomy, Rutgers, The State University of New Jersey, Piscataway, New Jersey 08854, United States.

<sup>5</sup> Department of Physics, University of California, One Shields Avenue, Davis, California 95616, United States.

<sup>6</sup> Advanced Photon Source, Argonne National Laboratory, Argonne, Illinois, 60439, United States

\*Corresponding authors' s E-mail: xtan6@gmu.edu, greenbla@chem.rutgers.edu

### **Electronic Supplementary Information**

## List of Tables and Figures

Figure S1: Laboratory (Cu K $\alpha$ ,  $\lambda = 1.5406 \text{ \AA}$ ) PXRD patterns before and after SPS.

Figure S2: Laboratory (Cu K $\alpha$ ,  $\lambda = 1.5406 \text{ \AA}$ ) PXRD patterns of FeAs<sub>2-x</sub>Se<sub>x</sub> ( $x = 0.30, 0.50, 0.60, 0.65, 0.75, 0.85, 1.0$ ).

Table S1. Fractional Positional Coordinates and Anisotropic Thermal Parameters for FeAs<sub>1.50</sub>Se<sub>0.50</sub>

Table S2: Rietveld refinement results from Synchrotron PXRD of FeAsSe

Figure S3: Topological and X-ray elemental maps for polycrystalline FeAsSe. Composition calculated from EMPA analysis and the polycrystalline sample provides the composition Fe<sub>1.023(6)</sub>As<sub>0.97(3)</sub>Se<sub>1.00(4)</sub>.

Figure S4: BSE images of FeAs<sub>2-x</sub>Se<sub>x</sub> ( $x = 0.30, 0.75, 0.85$ ) with Fe, As, and Se X-ray elemental maps.

Figure S5: Experimental data thermoelectric data for sintered pellets of FeAs<sub>2-x</sub>Se<sub>x</sub> ( $x = 0.30, 0.75, 0.85$ )

Figure S6: Carrier concentration and carrier mobility of FeAsSe sintered pellet.

Figure S7: Room temperature carrier concentration and mobility of FeAs<sub>2-x</sub>Se<sub>x</sub>.

Figure S8: The calculated electronic thermal conductivity of FeAsSe. Two different computational schemes, GGA(PBE) and mBJ, are provided for comparison.

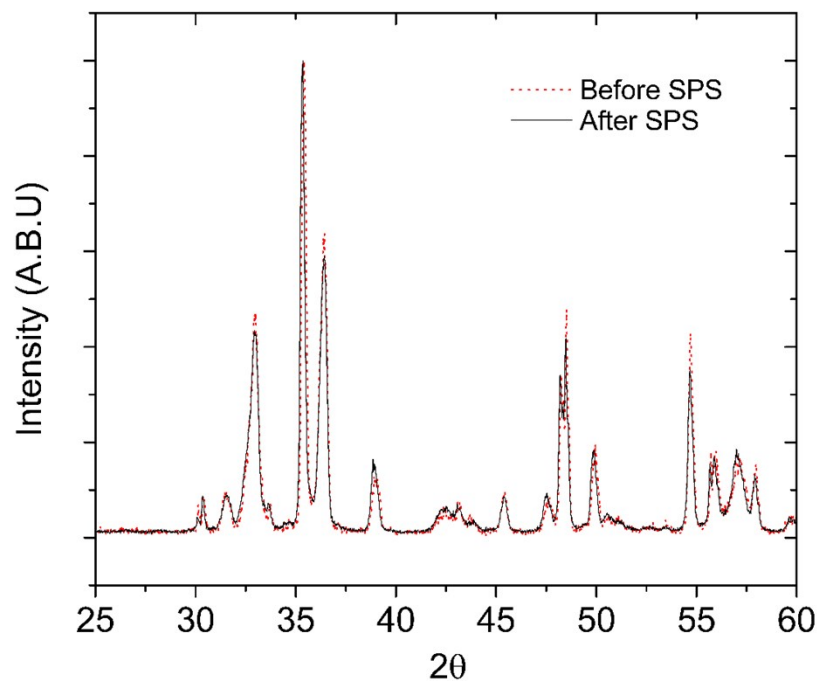

Figure S1: Laboratory (Cu  $K\alpha$ ,  $\lambda = 1.5406 \text{ \AA}$ ) PXRD patterns before and after SPS.

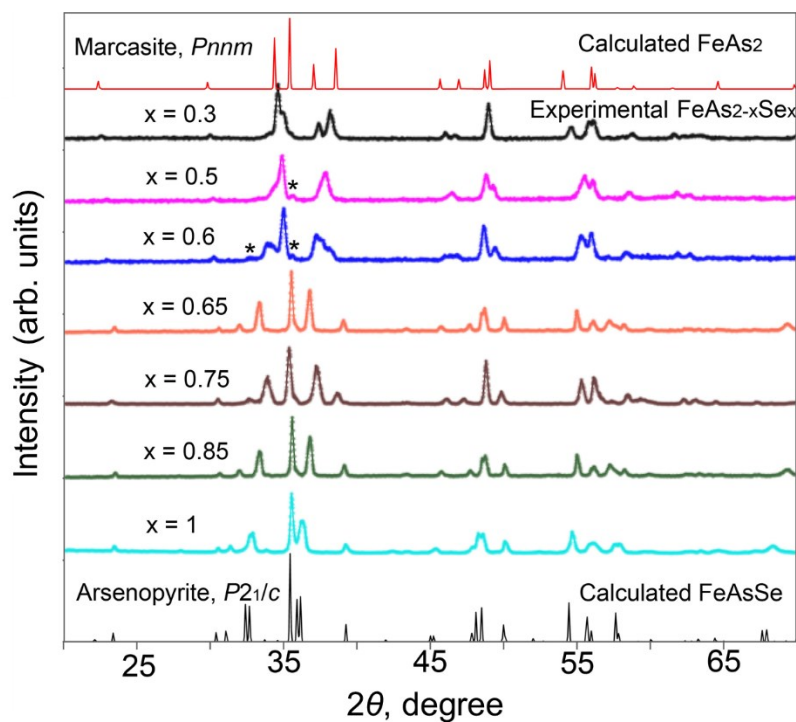

Figure S2: Laboratory PXRD (Cu  $K\alpha$ ,  $\lambda = 1.5406 \text{ \AA}$ ) patterns of  $\text{FeAs}_{2-x}\text{Se}_x$  ( $x = 0.30, 0.50, 0.60, 0.65, 0.75, 0.85, 1.0$ ). \* represents the peaks of small amount of Arsenopyrite phase.

Table S1. Fractional Positional Coordinates and Anisotropic Thermal Parameters for FeAs<sub>1.50</sub>Se<sub>0.50</sub>

| Label | Wyckoff Site | X          | Y          | Z   | Occupancy | U <sub>11</sub> (Å <sup>2</sup> ) | U <sub>22</sub> (Å <sup>2</sup> ) | U <sub>33</sub> (Å <sup>2</sup> ) | U <sub>23</sub> (Å <sup>2</sup> ) | U <sub>13</sub> (Å <sup>2</sup> ) | U <sub>12</sub> (Å <sup>2</sup> ) |
|-------|--------------|------------|------------|-----|-----------|-----------------------------------|-----------------------------------|-----------------------------------|-----------------------------------|-----------------------------------|-----------------------------------|
| Fe1   | 2a           | 1/2        | 1/2        | 1/2 | 1.00      | 0.0039(5)                         | 0.0025(5)                         | 0.0091(5)                         | 0                                 | 0                                 | -0.0006(3)                        |
| As2   | 4g           | 0.31907(9) | 0.13693(9) | 1/2 | 0.75      | 0.0048(3)                         | 0.0031(3)                         | 0.0063(3)                         | 0                                 | 0                                 | -0.00047(14)                      |
| Se2   | 4g           | 0.31907(9) | 0.13693(9) | 1/2 | 0.25      | 0.0048(3)                         | 0.0031(3)                         | 0.0063(3)                         | 0                                 | 0                                 | -0.00047(14)                      |

Table S2: Rietveld Refinement Results from Synchrotron PXRD of FeAsSe

|                                         | Comment                                                                                                                            |
|-----------------------------------------|------------------------------------------------------------------------------------------------------------------------------------|
| Nominal formula                         | FeAsSe                                                                                                                             |
| Wavelength (Å)                          | 0.414532                                                                                                                           |
| temperature (K)                         | 293 K                                                                                                                              |
| Space group                             | $P2_1/c$                                                                                                                           |
| Lattice Parameters<br><i>a, b, c, V</i> | $a = 5.95922(6)$ (Å), $b = 5.87517(6)$ (Å),<br>$c = 5.99802(7)$ (Å), $V = 192.499$ Å <sup>3</sup> ,<br>$\beta = 113.5566(5)^\circ$ |
| (R <sub>F</sub> , GOF)                  | 5.2, 2.1                                                                                                                           |
| Site                                    | x, y, z                                                                                                                            |
| <i>Fe</i>                               | 0.2720(5), -0.0013(5), 0.2813(4)                                                                                                   |
| <i>As</i>                               | 0.1509(3), 0.6312(3), 0.3666(3)                                                                                                    |
| <i>Se</i>                               | 0.3471(3), 0.3623(3), 0.1713(2)                                                                                                    |
| <i>Fe (Occupancy)</i>                   | 1                                                                                                                                  |
| <i>As (Occupancy)</i>                   | 1                                                                                                                                  |
| <i>Se (Occupancy)</i>                   | 0.970(5)                                                                                                                           |

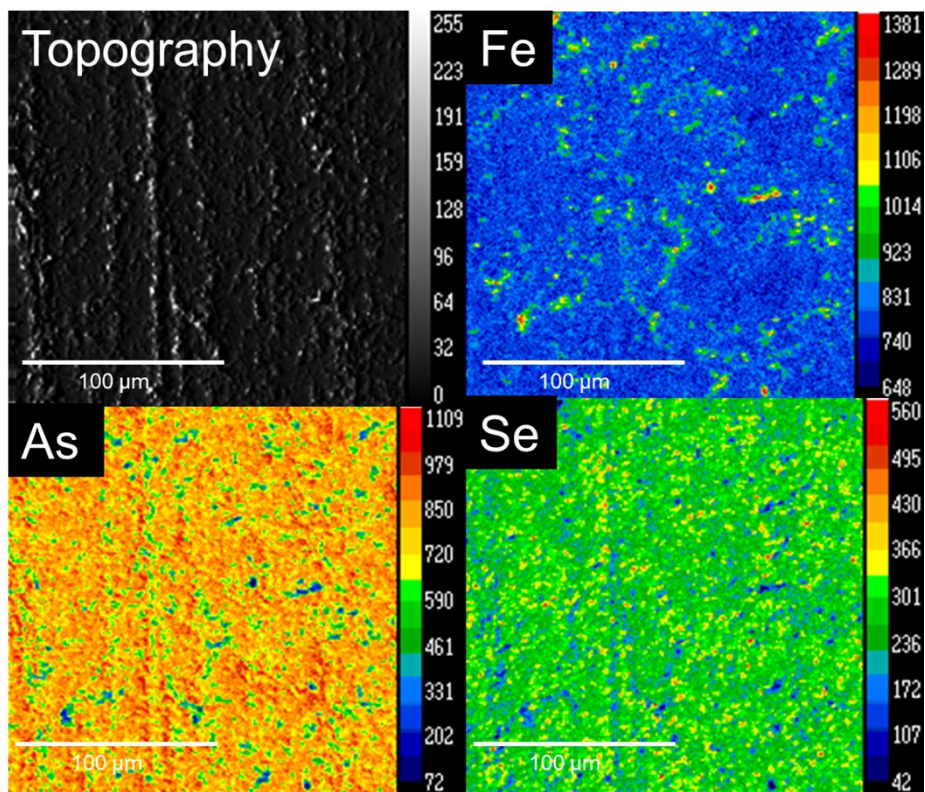

Figure S3: Topological and X-ray elemental maps for polycrystalline FeAsSe.

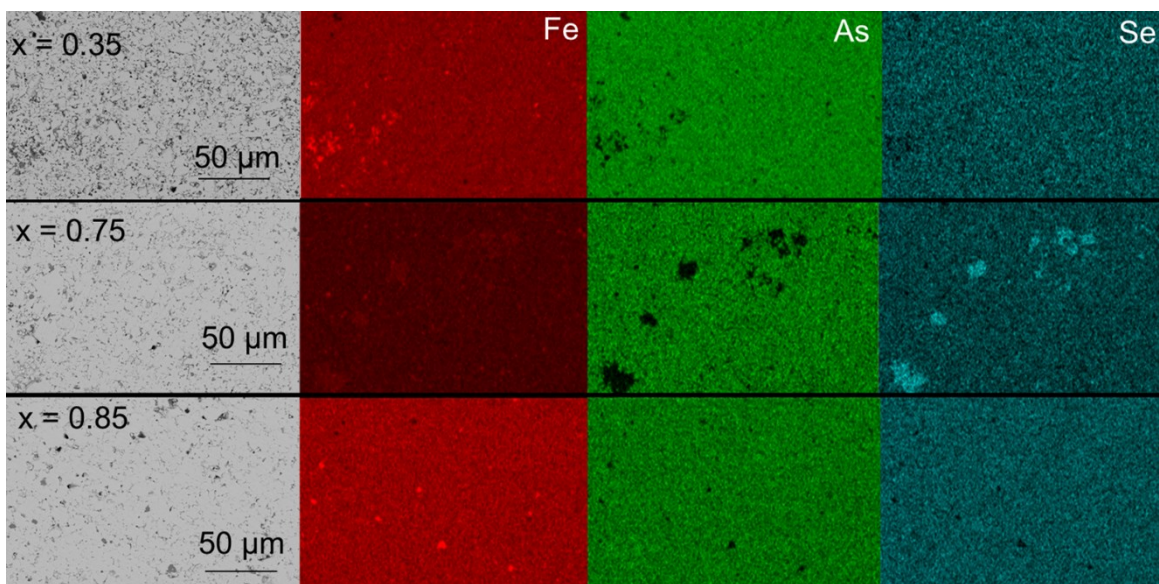

Figure S4: BSE images of  $\text{FeAs}_{2-x}\text{Se}_x$  ( $x = 0.30, 0.75, 0.85$ ) with Fe, As, and Se X-ray elemental maps.

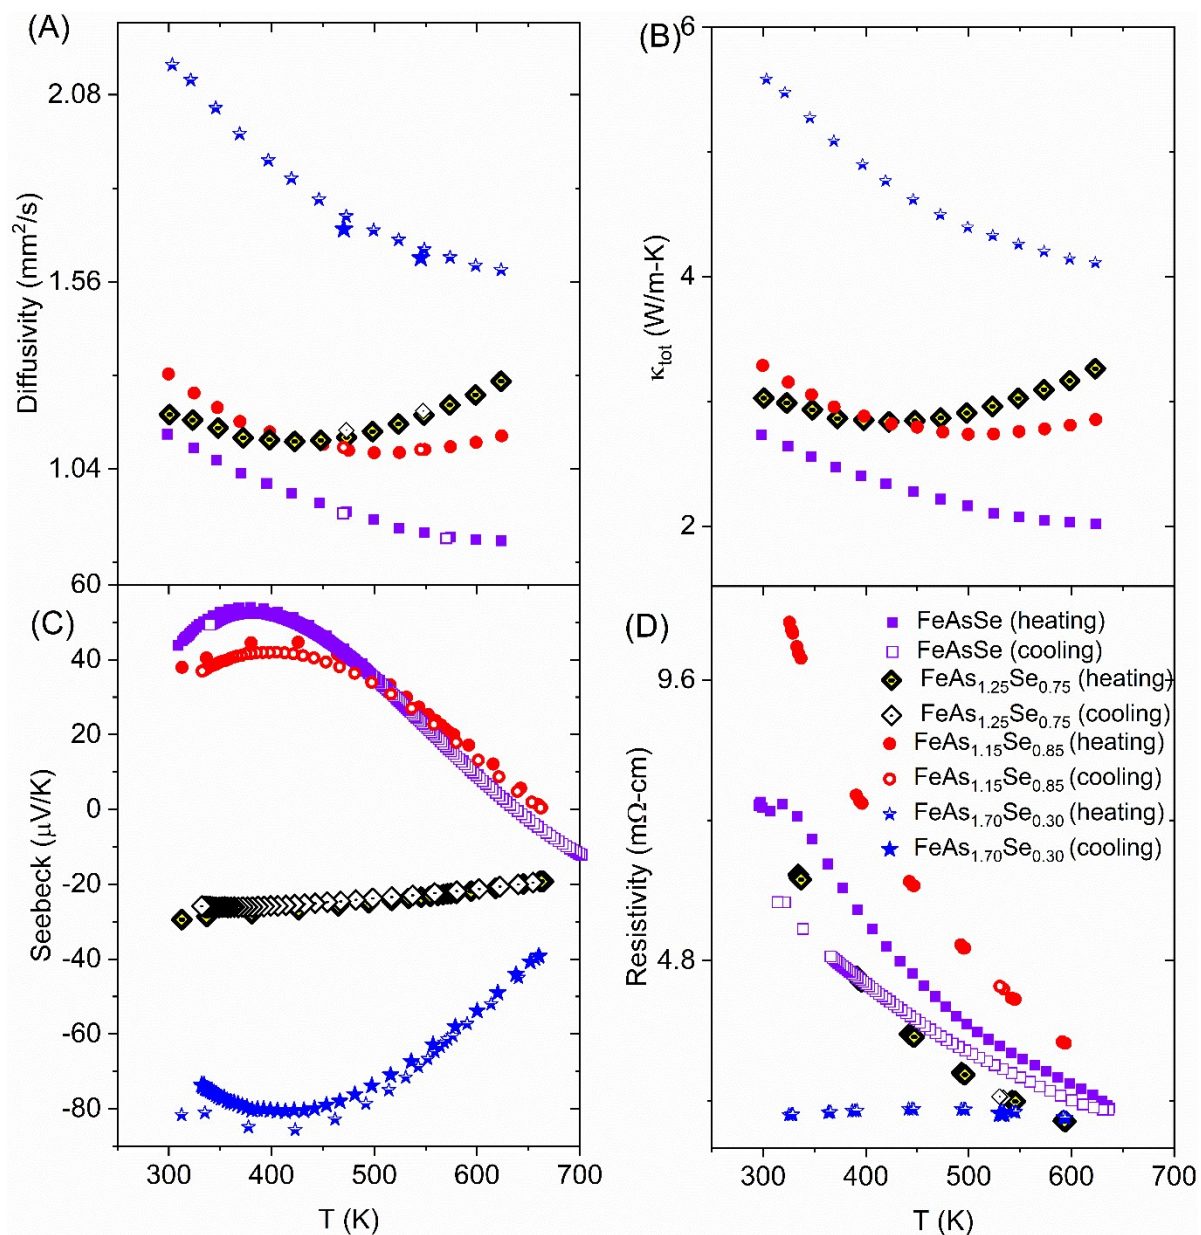

Figure S5: Thermally cycled experimental data showing (A) thermal diffusivity, (B) Thermal conductivity (C), Seebeck, and (D) resistivity for sintered pellets of  $\text{FeAs}_{2-x}\text{Se}_x$  ( $x = 0.30, 0.75, 0.85$ ).

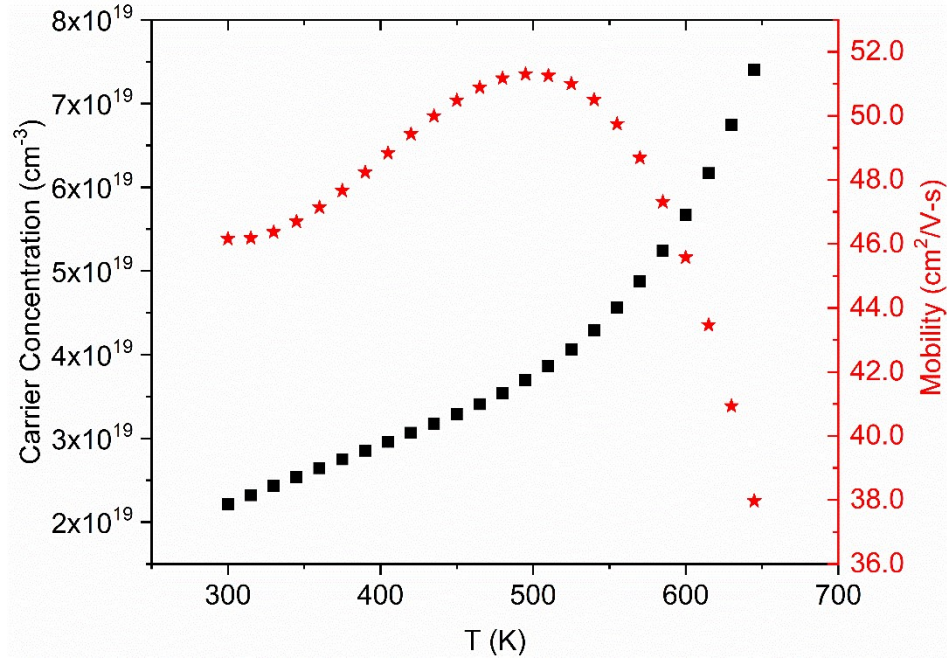

Figure S6: Carrier concentration and carrier mobility of FeAsSe measured on a sintered pellet.

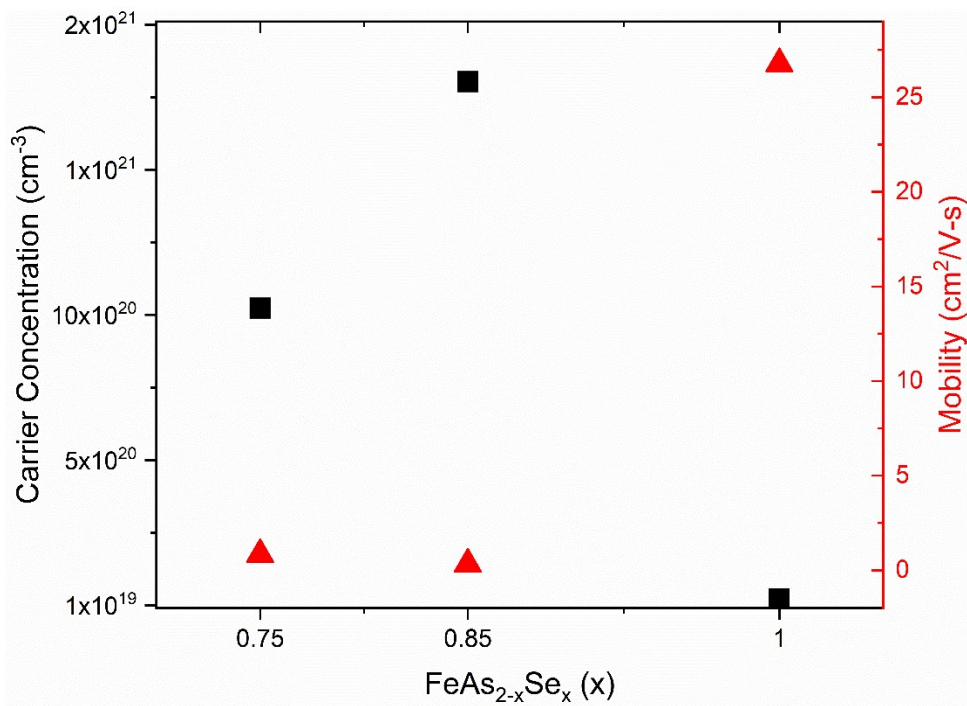

Figure S7: Room temperature carrier concentration and mobility of FeAs<sub>2-x</sub>Se<sub>x</sub> (x = 0.75, 0.85).

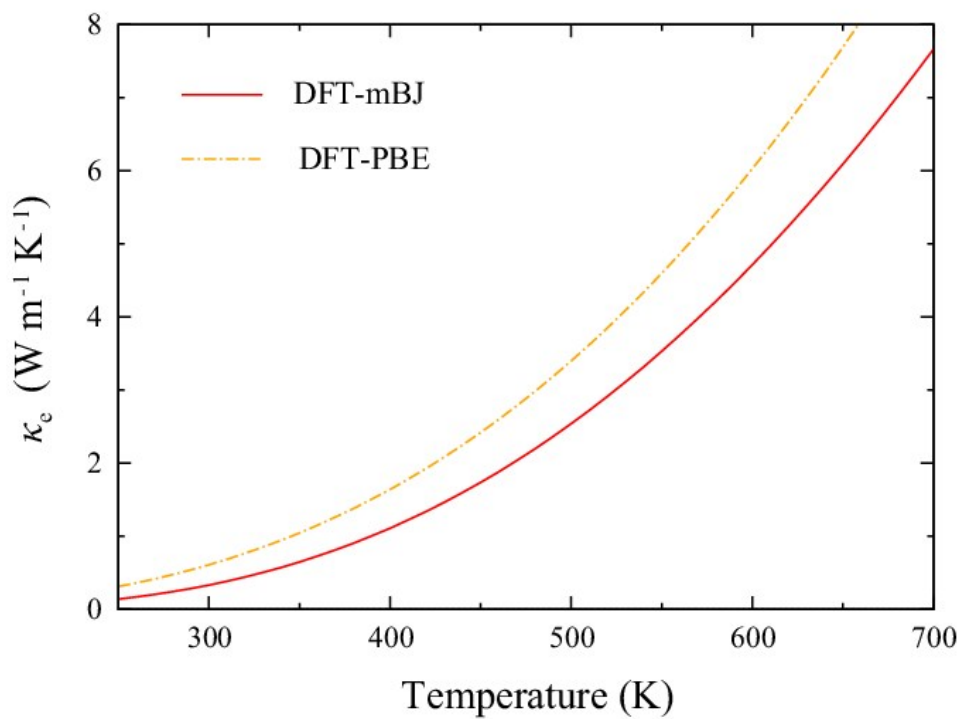

Figure S8: The calculated electronic thermal conductivity of FeAsSe. Two different computational schemes, GGA(PBE) and mBJ, are provided for comparison.
